# Supplementary material
Source: PubMed Central journal article supplement (PMC2879772)
Supplement: pp.110.153320_1.pdf [file pp.110.153320_1.pdf]

**SUPPLEMENTAL DATA**

**Supplemental Figure S1.** Growth Phenotype of *tbr* mutants

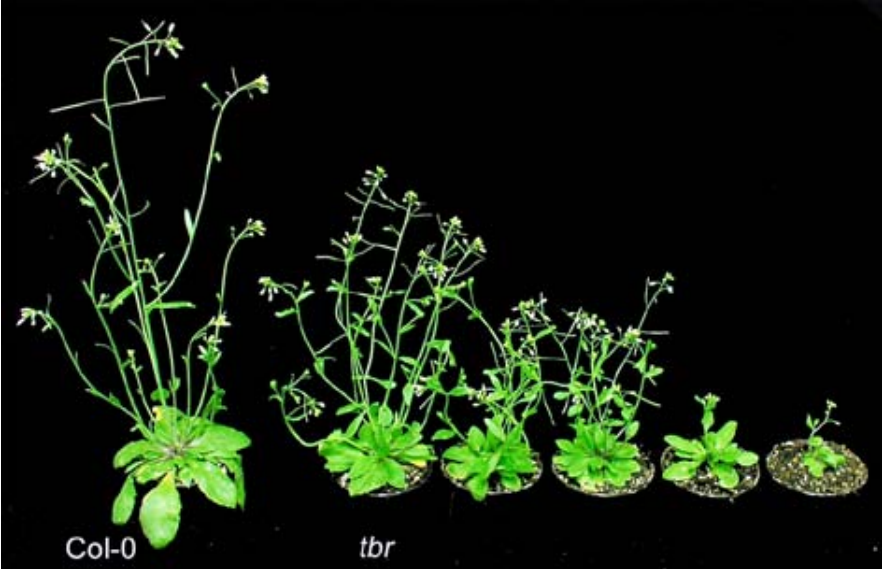

**Supplemental Figure S2.** Identification of *TBR* by recombinational mapping and cosmid complementation.

(A) Representation of Arabidopsis chromosome 5 in the region between 1.4 and 2.9 megabases (Mb), showing the positions of PCR-markers used for mapping. The number of recombination events (meiotic breakpoints) found for each marker in a total of 2496 examined chromosomes is given. Recombination events upstream or downstream of *TBR* are shown in the upper or lower row, respectively. (B) View of the mapping interval determined by flanking dCAPS marker *mpi70* (CER482882) and SSLP marker *mpi80* (CER482935). The positions of hybridization probes for cosmid library-screening are shown as asterisks.

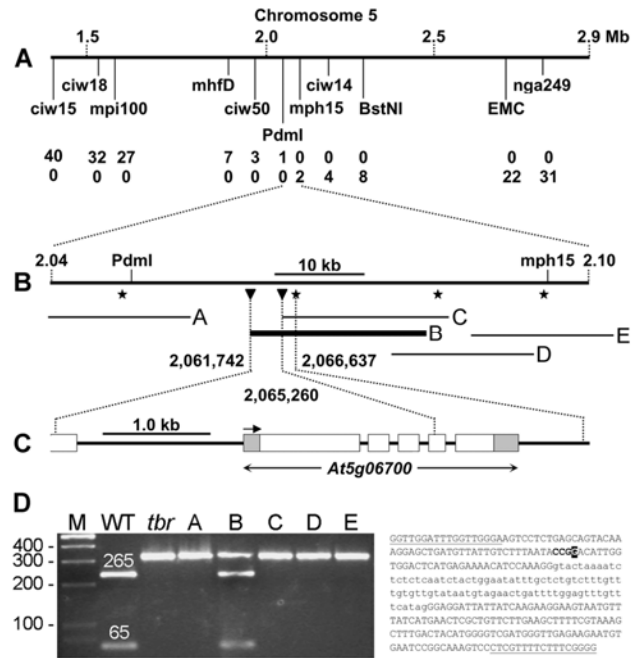

Complementing and non-complementing cosmid clones are depicted as bold and thin vertical lines, respectively, and labelled with A-E. Sequenced cosmid ends are indicated with triangles. (C) View of the ~5kb region responsible for complementation of the *tbr* phenotype. The structure of the one annotated gene (*At5g06700*) in that region is given. Exons are depicted as white boxes and untranslated regions of *At5g06700* i.e. *TBR* as grey boxes. The arrow indicates the direction of transcription. (D) The *tbr* point mutation is detectable by PCR using a co-dominant CAPS marker that exploits a *HpaII* restriction site present in the wild-type (giving 265 and 65 bp fragments) but absent in the *tbr* gene sequence. Primary *tbr* transformants that received genomic wild-type cosmid clone B invariably show a heterozygous PCR genotype. CAPS marker primer sequences are underlined and exon sequence is shown in capital letters. The *HpaII* site is shown in bold and the *tbr* polymorphic nucleotide with black background.

**Supplemental Figure S3.** Complementation of *tbr* mutant by 35S::*TBR*.

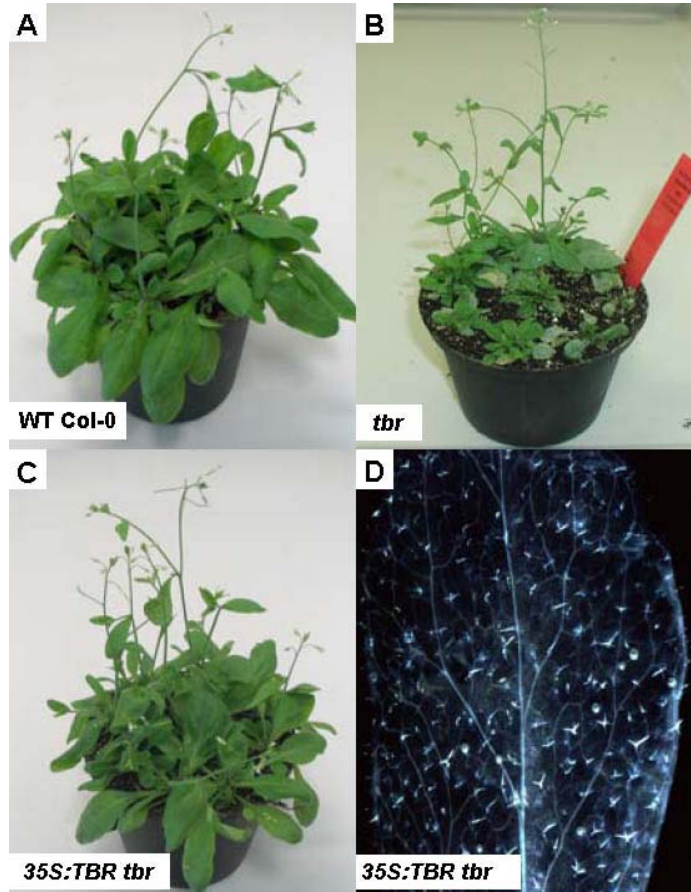

(A) Uniform growth aspect of wild-type Col-0 plants and (B) variable growth aspect of *tbr* mutants. (C, D) Wild type-like growth and trichome birefringence of *tbr* mutants transformed with a 35S::*TBR* construct.

**Supplemental Figure S4.** Structure and sequence alignment of DUF231 domain proteins

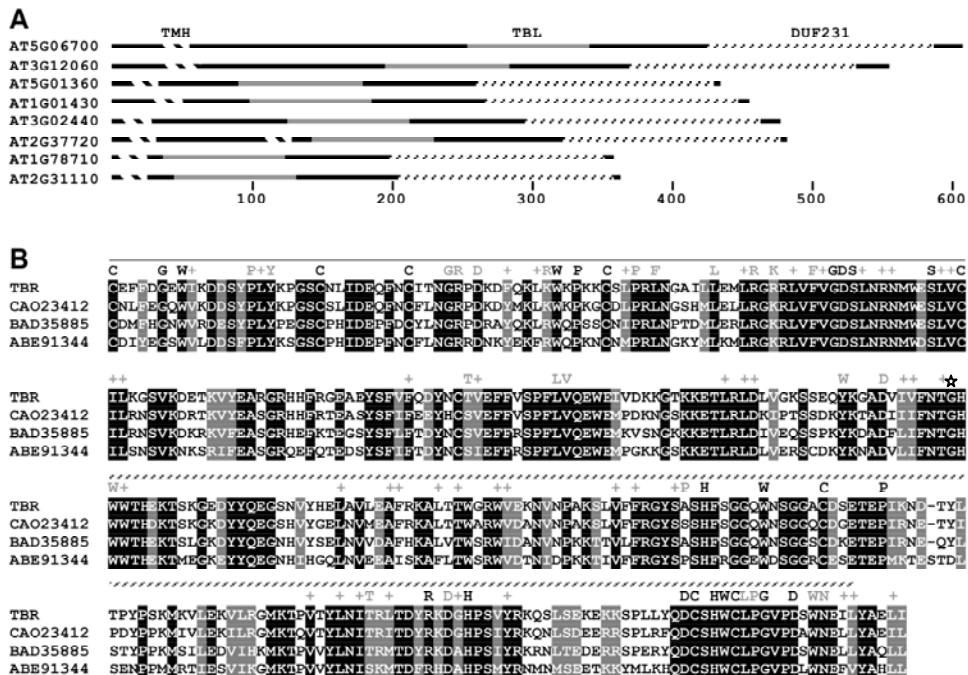

(A) Lengths and domain structure of TBR and a selection of seven additional Arabidopsis TBL proteins. Grey and fine crosshatched areas represent TBL and C-terminal DUF231 domains, respectively. Coarsely crosshatched areas depict putative transmembrane regions (TMH). Numbers below give the lengths in amino acids. (B) Partial protein sequence alignment of TBR and its closest grapevine (CAO23412), rice (BAD35885) and barrel medic (ABE91344) homologs. The alignment was created with ClustalW and Boxshade 3.21. Grey and hatched lines above the alignment represent TBL and DUF231 domains, respectively. Amino acids that are identical or similar in all four sequences are shaded. Amino acids that are 100% conserved in all 46 Arabidopsis TBL sequences are shown in black font above the alignment. Positions with similar amino acids in all 46 Arabidopsis sequences are marked with grey font symbols: an amino acid letter is given if this amino acid is present in more than 80% of the sequences, otherwise + is shown. The glycine residue changed in the *tbr* mutant is marked with a star.

**Supplemental Figure S5.** Molecular Characterization of *tbl3* T-DNA Insertion Mutants.

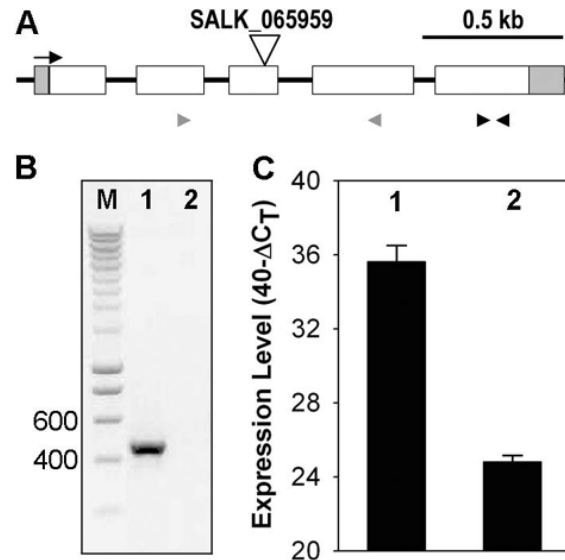

(A) *TBL3* (*At5g01360*) gene structure. Exons are depicted as white boxes and untranslated transcript regions as grey boxes. The arrow indicates the direction of transcription. The annotated T-DNA insertion site in SALK\_065959 is shown as white triangle and primer pairs used for PCR amplifications are shown as grey and black triangles. (B) PCR amplification from (lane 1) wild-type and (lane 2) *tbl3* mutant cDNA with primers (grey triangles in (A)) spanning the annotated insertion site. 35 PCR cycles were performed. The expected 461 bp product is amplified only from wild-type cDNA. A molecular weight marker (M) is shown to the left. (C) Quantitative RT-PCR amplification from (1) wild-type or (2) *tbl3* mutant cDNA with primers amplifying a 61 bp product located downstream of the T-DNA insertion site in the last exon. The expression level is given on a logarithmic scale expressed as  $40 - C_T$ , where  $C_T$  is the difference in qRT-PCR threshold cycle number between *At5g01360* and the reference gene (*UBQ10*; *At4g05320*); 40 therefore equals the expression level of *UBQ10*; the number 40 was chosen because the PCR run stops after 40 cycles. The fold difference in expression is  $2^{-C_T}$  when product doubles in each cycle, e.g.: an ordinate value of 36 represents a ~1000-fold higher initial abundance than a value of 26. The results are the mean  $\pm$  deviation of two biological replicates (pooled material from different growth experiments) with two technical replications for each.

## Supplemental Figure S6. Growth Phenotype of *tbr3* mutants

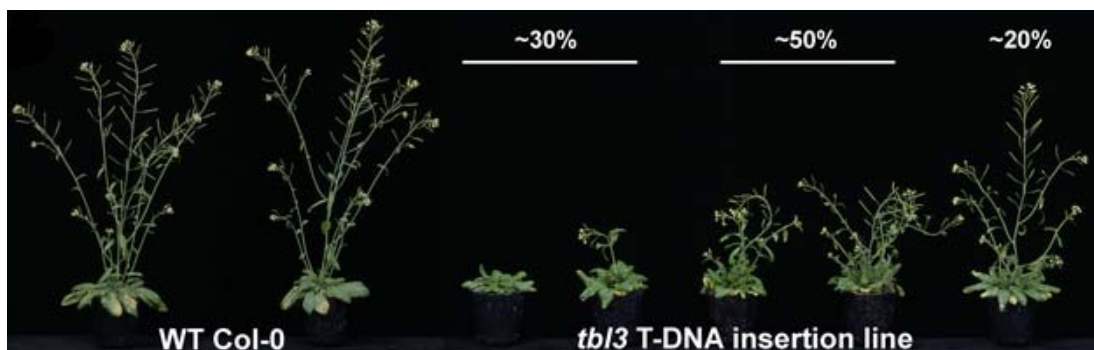

**Supplemental Table S1.** Specifications and primer sequences of mapping markers and the *tbr* CAPS marker.

| Marker Name & Type | Chr. 5 Position (Mb) | BAC Clone | Polymorphism                  | Primer Sequences (5' → 3')                       | Product Length (bp)    | [Mg <sup>2+</sup> ] (mM)<br>T <sub>a</sub> (°C) |
|--------------------|----------------------|-----------|-------------------------------|--------------------------------------------------|------------------------|-------------------------------------------------|
|                    |                      |           |                               |                                                  | Col / Ler / <i>tbr</i> |                                                 |
| ciw15<br>SSLP      | 1.409                | MUK11     | INDEL55                       | TCCAAAGCTAAATCGCTAT<br>CTCCGTCTATTCAAGATGC       | 177 / 122              | 2.0 / 55                                        |
| ciw18<br>SSLP      | 1.531                | K2A11     | INDEL6                        | AACACAACATGGTTTCAGT<br>GCCGTTTGTCTCTTCAC         | 135 / 129              | 2.0 / 53                                        |
| mpi100             | 1.577                | K18I23    | CER454290<br>INDEL19          | AGAACTAAGAGTAGACACGCACT<br>CTGATCCCAAGCCTGTATAT  | 175 / 156              | 2.5 / 55                                        |
| nga158<br>SSLP     | 1.698                | MJJ3      | INDEL4                        | ACCTGAACCATCTCCGTC<br>TCATTTTGCCGACTTAGC         | 108 / 104              | 2.5 / 55                                        |
| MHFD<br>SSLP       | 1.899                | MHF15     | INDEL                         | AAAAACCCAAACTTCTATTATAC<br>ACTTCGCTTCAAGTAAAGAGG | 124 / ~114             | 2.5 / 55                                        |
| mpi50<br>SSLP      | 1.968                | MHF15     | CER455774<br>INDEL52          | CAACATCAATGGTCTTAGTC<br>GATGCACAGAAAGGTCATG      | 429 / 377              | 2.5 / 55                                        |
| mpi70<br>dCAPS     | 2.049                | F15M7     | CER482882<br>SNP G/T (PdmI)   | ATTTTGTTTGGCGATTGAG<br>CAACTCTTTTCTGCAGAAAGTTT   | 128, 20 / 148          | 2.5 / 52                                        |
| <i>tbr</i><br>CAPS | 2.065                | MPH15     | <i>tbr</i><br>SNP G/A (HpaII) | GGTTGGATTTGGTTGGGA<br>GCCCGAAAGAAAACGAG          | 265, 65 / 330          | 2.0 / 50                                        |
| mpi80<br>SSLP      | 2.095                | MPH15     | CER482935<br>INDEL12          | ACGCCTCATATGCACATTAAC<br>AGCAACTAGTCGAATCGCTTAG  | 205 / 193              | 2.5 / 50                                        |
| ciw14<br>SSLP      | 2.174                | MOJ9      | INDEL                         | CATGATCCATCGTCTTAGT<br>AATATCGCTTGTTTTTGC        | 179 / ~160             | 2.2 / 55                                        |
| mpi60<br>CAPS      | 2.271                | T28J14    | CER476482<br>SNP G/A (BstNI)  | GTGAACTGTGCAGGCATAAG<br>CACAAGATTGCATCCTTTGAC    | 291, 163 / 454         | 2.0 / 50                                        |
| EMC<br>SSLP        | 2.666                | F8L15     | INDEL4                        | AACAGATCGGAAAATCGTCG<br>AATGACGACGAGACGCTCTT     | 131 / 135              | 2.5 / 50                                        |
| nga249<br>SSLP     | 2.770                | MAH20     | INDEL10                       | GGATCCCTAACTGTAATAATCCC<br>TACCGTCAATTCATCGCC    | 125 / 115              | 2.5 / 50                                        |

Mb: megabase; bp: base pair; Col: wild-type Columbia-0; *Ler*: wild-type Landsberg *erecta*; T<sub>a</sub>: annealing temperature used for PCR amplification. Mismatched nucleotides in dCAPS marker primers are underlined.



**Supplemental Table S3.** Genes co-expressed with *TBR* or *TBL3*

| <b>Genes co-expressed with <i>TBR</i>, ranked by r-value (&gt;0.7)<sup>a</sup></b>   |                            |                                                      |
|--------------------------------------------------------------------------------------|----------------------------|------------------------------------------------------|
| <b>Rank</b>                                                                          | <b>Arabidopsis Gene ID</b> | <b>Description</b>                                   |
| 1                                                                                    | At1g05850                  | chitinase-like protein 1 (CTL1)                      |
| 2                                                                                    | At5g09870                  | CESA5                                                |
| 3                                                                                    | At3g49220                  | pectinesterase family protein                        |
| 4                                                                                    | At3g23820                  | NAD-dependent epimerase/dehydratase                  |
| 5                                                                                    | At5g52060                  | BAG domain-containing protein                        |
| 6                                                                                    | At3g02250                  | expressed protein                                    |
| 7                                                                                    | At5g64740                  | CESA6 (PRC)                                          |
| 8                                                                                    | At3g23050                  | auxin-responsive protein (IAA7)                      |
| 9                                                                                    | At1g12500                  | phosphate translocator-related                       |
| 10                                                                                   | At5g60920                  | COBRA phytochelatin synthetase                       |
| 11                                                                                   | At5g05170                  | CESA3 (IXR1)                                         |
| 12                                                                                   | At1g72180                  | LRR transmembrane protein kinase                     |
| 13                                                                                   | At1g29670                  | GDSL-motif lipase/hydrolase family protein           |
| 14                                                                                   | At2g35860                  | fasciclin domain-containing protein                  |
| 15                                                                                   | At4g27430                  | CIP7                                                 |
| 16                                                                                   | At2g39010                  | putative plasma membrane aquaporin                   |
| <b>Genes co-expressed with <i>TBL3</i>, ranked by r-value (&gt;0.75)<sup>a</sup></b> |                            |                                                      |
| 1                                                                                    | At5g40020                  | pathogenesis-related thaumatin family protein        |
| 2                                                                                    | At5g54690                  | GAUT12, IRX8                                         |
| 3                                                                                    | At3g16920                  | chitinase-like glycoside hydrolase family 19 protein |
| 4                                                                                    | At3g62020                  | germin-like protein (GLP10)                          |
| 5                                                                                    | At5g17420                  | CESA7 (IRX3)                                         |
| 6                                                                                    | At5g60720                  | expressed protein, contains DUF547                   |
| 7                                                                                    | At1g27380                  | RIC2                                                 |
| 8                                                                                    | At5g44030                  | CESA4 (IRX5)                                         |
| 9                                                                                    | At4g18780                  | CESA8 (IRX1)                                         |
| 10                                                                                   | At5g15630                  | IRX6, COBL4 phytochelatin synthetase                 |
| 11                                                                                   | At2g38080                  | IRX12, LAC4                                          |
| 12                                                                                   | At5g01190                  | similar to laccase                                   |
| 13                                                                                   | At4g08160                  | glycosyl hydrolase family 10 protein                 |
| 14                                                                                   | At5g03170                  | FLA11                                                |
| 15                                                                                   | At2g37090                  | IRX9, GT43 glycosyltransferase-like                  |
| 16                                                                                   | At5g60020                  | LAC17                                                |
| 17                                                                                   | At3g18660                  | glycogenin glucosyltransferase (glycogenin)-related  |
| 18                                                                                   | At3g50220                  | expressed protein, contains DUF579                   |
| 19                                                                                   | At1g58370                  | similar to (1,4)-beta-xylan endohydrolase (GH10)     |
| 20                                                                                   | At1g79620                  | LRR transmembrane protein kinase, putative           |
| 21                                                                                   | At2g41610                  | expressed protein                                    |
| 22                                                                                   | At4g27435                  | expressed protein                                    |
| 23                                                                                   | At5g45970                  | Rac-like GTP-binding protein (ARAC2)                 |

(a) Results and r-values were obtained from GeneCAT (Mutwil *et al.*, 2008).



### **Protocol S1: Positional cloning of the *tbr* locus**

To obtain a high-resolution map position for the *TBR* locus, 96 *tbr* mutant plants were selected from the F2 progeny of a cross of the *tbr* mutant and the *Landsberg erecta* ecotype, and a mixed DNA sample from these *tbr* mutant F2 plants was prepared and scored with a series of co-dominant PCR-based markers (Lukowitz *et al.*, 2000). This bulked segregant analysis placed the *tbr* mutation on the top of chromosome 5 between simple sequence length polymorphism (SSLP) markers *ciw13* (@ 1.00 Mb) and *nga249* (@ 2.77 Mb) (Fig. S2). More than 1200 individual DNA samples from homozygous *tbr* mutant plants from the segregating F2 mapping population were subsequently scored for recombination events between markers *ciw15* and *nga249*, resulting in the identification of 40 lines with a recombination event between *ciw15* and *tbr* and 31 lines with a recombination event between *tbr* and *nga249* (Fig. S2). By analyzing ten additional SSLP, cleaved amplified polymorphic sequence (CAPS) and derived CAPS (dCAPS) markers (Table S1), the interval containing the *TBR* locus was narrowed to a 46 kb genomic region between markers *mpi70* and *mpi80* (Fig. S2). A set of five cosmid clones (named A-E in Fig. S2) covering the 46 kb interval was identified from a genomic Col-0 cosmid library constructed in the binary vector pBIC20 (Meyer *et al.*, 1994) using colony hybridization with four sequence-specific DNA probes (the positions are marked with asterisks in Fig. S2), and multiplex PCR. The five cosmid clones were individually introduced into *tbr* mutants via *Agrobacterium tumefaciens*-mediated transformation. Kanamycin-resistant progeny of *tbr* mutants transformed with cosmid clone B were complemented for the *tbr* trichome birefringence and growth phenotypes, as judged by the occurrence of bright birefringence and the wild-type growth aspect in 3/4 of the T2 plants. By contrast, the progeny of *tbr* mutants transformed with cosmid clones A, C, D or E still had the typical *tbr*-like dark trichomes under polarized light and retained their mutant growth aspect in the T2 generation, implying that these cosmid clones do not contain the wild-type *TBR* gene and hence cannot complement the *tbr* mutation.

### ***Genetic mapping of the *tbr* locus***

Linkage of the *TBR* locus to the top of chromosome 5, between simple sequence length polymorphism (SSLP) markers *ciw13* and *nga249*, was established by bulked segregant analysis according to Lukowitz *et al.* (2000). Over 1200 *tbr* mutant-like plants were subsequently identified from the *tbr* x *Landsberg erecta* F2 mapping population, and for each plant, a DNA sample was prepared from inflorescence or leaf tissue using a quick alkaline-lysis protocol

(Lukowitz *et al.*, 2000). Co-dominant PCR markers used for fine mapping were identified (ciw14, ciw15, ciw18, mhfD, EMC, nga249) from the genetic maps provided by the Arabidopsis Information Resource (<http://www.arabidopsis.org>) or designed (mpi50, mpi60, mpi70, mpi80, mpi100) using the CEREON Genomics database of Col-0/Landsberg polymorphisms and dCAPS finder 2.0 (Neff *et al.*, 2002). Detailed information for the new markers is available in Supplemental Table S1. PCR conditions for SSLP markers were 50 mM KCl, 10 mM Tris-HCl, pH 9.0, at 25°C, 0.1% Triton X-100, 200 µM each of dATP, dGTP, dTTP, and dCTP, 10 pmol of each primer, 2.0 to 2.5 mM MgCl<sub>2</sub>, 1 unit of *Taq* polymerase (Promega, Madison, WI), and 10 to 50 ng of genomic DNA, to a final volume of 22 µL. The PCR program was as follows: 1 min at 94°C; 40 cycles of 20 s at 94°C, 20 s at 50 to 55°C, and 30 s at 72°C; and 2 min at 72°C. Four percent agarose gels (3:1 HR agarose; Amresco, Solon, OH) were used to resolve SSLP markers for mapping.

#### ***Cosmid isolation and tbr mutant complementation***

Using colony hybridization, according to Roche's DIG application manual (<http://www.roche-applied-science.com>), with four sequence-specific, digoxigenin-11-dUTP-labeled 301- to 505-bp DNA probes (the positions are marked with asterisks in Fig. S2), multiple clones corresponding to the 46kb *TBR*-containing mapping interval were isolated from a genomic Col-0 cosmid library constructed in the binary vector pBIC20 (Meyer *et al.*, 1994). A minimal set of five overlapping clones, covering the interval, was identified by multiplex PCR using the same primer pairs (sequences available on request) that amplified the hybridization probes. Mutant *tbr* plants were transformed by *Agrobacterium tumefaciens* (GV3101) carrying the various cosmid clones according to Clough and Bent (1998), and T1 transformants were selected on half-strength Murashige & Skoog agar plates containing kanamycin (50 µg/mL). Trichome birefringence of adult T1 transformants was analyzed as described above. Complementation was also achieved by PCR-amplifying a 2.45 kb genomic fragment comprising the entire *TBR* coding region with primers 5'-CAATGGATCCCAACCCTAAAACCACTCGTC-3' and 5'-CAATGTCGACAACCTCTCTTTGGAGCTAAAT-3', then inserting the fragment into the *Bam*HI / *Sall* restriction sites of pBinAR (Bevan, 1984) followed by *Agrobacterium tumefaciens* (GV3101) mediated transformation of *tbr* plants, and kanamycin-selection of transformants. Furthermore, complementation of *tbr* mutants could also be largely achieved with a genomic PCR-fragment harboring the *TBL1* (*At3g12060*) gene driven by a 1.64 kb *TBR* promoter sequence (results not shown). The *TBL1* fragment was amplified with primers 5' –

GGAGATAGAACCATGGCGTTGGACTCCGTTA-3' and 5'-CAAGAAAGCTGGGTCTTAACTCCTATGATCTTTTAGG-3', inserted into pDONR207 (Invitrogen) before recombination with a pMDC32-derived GATEWAY™ destination vector (Curtis and Grossniklaus, 2003), named pVolki, in which the 2x 35S promoter was replaced by 1.64kb of *TBR* promoter sequences. The construct was transferred into *tbr* mutant plants by *Agrobacterium* mediated transformation (Clough and Bent, 1998), and transgenic plants were selected on hygromycin and analyzed for complementation by assessing *tbr* trichome birefringence.

### ***DNA sequencing***

Genomic DNA was prepared using a cetyl-trimethylammonium bromide-detergent extraction method (Lukowitz *et al.*, 2000) from Col-0 wild-type and *tbr* mutant plants. A 2.83-kb fragment encompassing the *TBR* (*At5g06700*) gene sequence, 172 bp 3'-UTR, the 151 bp 5'-UTR and 332 bp promoter region was amplified independently by PCR three times from each genotype using the primers 5'-ATTTCCGGATAATTTAGTTAGA-3' and 5'-ATATTGTATTCGTCGTGACA-3' and a mixture of *Taq* and proofreading *Pfu* polymerases (Promega). Cycle sequencing of both strands of the PCR products was performed by MWG Biotech (Ebersberg, Germany) with a set of eight additional primers (sequences available on request).

### **Protocol S2: Biochemical analyses of *tbr* and *tbl3* cell walls**

Wild-type Col-0 and *tbr* mutant plants were grown on soil for five weeks. Trichomes were harvested from mature rosette leaves as described by Zhang and Oppenheimer (2004, crystalline cellulose measurement), or by shaving them from deep frozen leaves using a razor blade (HPLC analysis). Stems of wild-type Col-0 and *tbl3* mutant plants were harvested 10, 15 and 20 days after bolting. Crude cell wall extracts were prepared as described (Reiter *et al.*, 1993) with minor adaptations. Stem material from wild-type and *tbl3* mutants harvested between the first and second node. Plant material was harvested by snap freezing in liquid nitrogen, and then incubated twice during 60 min at 70°C in 70% ethanol. Pellets were suspended with chloroform:methanol (v/v; 1:1), washed in acetone for 2 min and vacuum-dried. Following suspension in 0.25 M sodium acetate-buffer (pH 4.0), samples were heated (20 min at 80°C) and then chilled on ice. After adjusting the pH to 5.0 with 1M sodium hydroxide, residual starch was removed by incubating the samples overnight at 37°C in 0.01% sodium azide containing amylase (50 µg / ml;

SIGMA, Germany) and pullanase (SIGMA, Germany). Samples were then boiled for 10 min, washed until no reducing sugars could be detected with anthrone reagent, and vacuum-dried.

The dry CW pellet was weighed into a 2 mL screw capped reaction tube suspended with 50 µg of *myo*-Inositol (internal standard) and hydrolyzed in 250 µL 2 M TFA at 121°C for 1 h. After allowing to cool down, the samples were diluted with 300 µL of 2-propanol and dried under a stream of nitrogen. The procedure was repeated three times. Adding 200 µL ddH<sub>2</sub>O, the samples were vortexed vigorously, sonicated for 10 min and centrifuged to remove residual TFA-hydrolyzed material. The supernatant was carefully separated from the pellet. 50 µL of the supernatant was reduced in 250 µL of reduction reagent (sodium borohydride in 1 M ammonium hydroxide) at RT for 1 h. Reduction was terminated by adding 20 µL glacial acetic acid. The reduced samples were suspended with 250 µL of glacial acetic acid:methyl alcohol (v/v; 1:9) and dried under a nitrogen stream. The procedure was repeated three times followed by four evaporations with 250 µL of methyl alcohol. For acetylation, the reduced samples were suspended in 50 µL acetic anhydride and 50 µL pyridine and were incubated at 121°C for 20 min. Adding twice 200 µL of toluene the samples were evaporated, were suspended in 500 µL ddH<sub>2</sub>O and 500 µL methylene chloride and vortexed. The organic phase (containing per-O-acetylated alditols) was transferred to a new 2 mL reaction tube. The solution was evaporated shortly, suspended with 100 to 300 µL acetone and analyzed using a Agilent 6890 Series GC system equipped with a 5975B inert XL MSD and an SP-2380 fused silica capillary column (30 m 3 0.25 mm i.d. x 20 mm film thickness; Supelco).

50 µL of the TFA hydrolysis supernatant was used to determine uronic acid by a carbazole assay in which sulfamate and m-hydroxydiphenyl were used to completely eliminate interference by neutral sugars (Filisetti-Cozzi and Carpita, 1991). The absorbance was analyzed at 540 nm (Anthros Reader HT II, Eugendorf, Austria).

For the determination of crystalline cellulose, the insoluble TFA pellets (or crude CW material) were suspended with 1.5 mL Updegraff reagent (acetic acid:nitric acid:water; 8:1:2; v/v) and further incubated in a boiling water bath for 30 min. Crystalline cellulose was determined as described (Updegraff, 1969; Scott and Melvin, 1953). Absorbance was determined at 620 nm (Anthos Reader HT II, Eugendorf, Austria).

Monosaccharides extracted from trichome cell walls by TFA (2M) hydrolysis were determined by high performance anion exchange chromatography (HPAEC) as described in Neumetzler

(2010). Trichomes were harvested by leaf hair depilation (LHD) following the protocol described in Ebert *et al.* (2010). HPAEC of monosaccharides was performed on a DX 500 system (Dionex, Sunnyvale, CA, USA) equipped with a GP 50 gradient pump, a CarboPac PA20 Guard column (3 mm ID x 30 mm L) Dionex, Sunnyvale, CA, USA) and a subsequent CarboPac PA20 column (3 mm ID x 150 mm L) both from Dionex (Sunnyvale, CA, USA). Detection was carried out using a pulsed amperometric detector (PAD, Dionex, Sunnyvale, CA, USA). In brief, after equilibration neutral sugars were separated by an isocratic flow (0.15 ml/min) using 5 mM NaOH (solvent A) for 30 min. After raising the proportion of solvent B (800 mM NaOH) from 0% to 35% between 40 min and 50 min, it was further increased up to 100% from 50 min to 60 min before an isocratic flow of 100% solvent B from 60 min to 70 min were kept to separate uronic acids. The column was re-equilibrated by ramping solvent A from 0% to 100% between 70 min and 80 min. Afterwards a constant isocratic flow of 100% solvent A was kept until 100 min and before new samples were loaded. Assignments of all peaks were carried out according to retention times of pure standards.

### **Protocol S3: Pectin methylesterase (PME) extraction and activity assay.**

Etiolated seedlings were snap-frozen in liquid nitrogen and homogenized to fine powder using a ball mill (1 min, 30 Hz, Retsch, Germany). PMEs were extracted by incubating the plant powder for 1h at 4°C and at constant shaking (600 rpm, Thermomixer comfort, Eppendorf, Germany) in 50mM Na<sub>2</sub>HPO<sub>4</sub> extraction buffer (pH7) supplemented with 12mM citric acid, 1M NaCl, 0.01% (v:v) Tween20, 0.2% (w:v) polyvinylpyrrolidon (PVPP) and 5µl EDTA free protease inhibitor cocktail per 1ml extraction buffer.

The PME activity was assayed by the measurement of the released methanol. Therefore 10µl of the samples protein extract were added to 75µl Na-phosphate buffer (50mM, pH 7.5), 5µl Alcohol Oxidase (5U/ml, *Pichia pastoris*, Sigma, A2404), 10µl pectin (20 mg/ml solved in 50 mM Na-phosphate buffer, pH 7.5) containing either 34%, 65% or 89% of methylesters (Sigma: P-9311, P-9436, P-9561) and incubated for 20 min at 28°C (600 rpm, Thermomixer comfort, Eppendorf, Germany). The reaction was stopped by adding 100µl revelation buffer (2M ammonium acetate, 0.28% (v:v) acetic acid, 0.2% (v:v) 2,4-pentandione) and incubation for 10 min at 67°C. Absorbance was read at 420 nm and methanol release was calculated as in parallel a standard curve was performed using 0-20 mg/L methanol as sample. All measurements were performed in technical duplicates and indicated numbers of biological replicates.

## Supplemental References

- Bevan M** (1984) Binary *Agrobacterium* vectors for plant transformation. *Nucleic Acids Res* **12**: 8711-8721
- Curtis MD, Grossniklaus U** (2003) A gateway cloning vector set for high-throughput functional analysis of genes in planta. *Plant Physiol* **133**: 462-469
- Ebert B, Zoeller D, Erban A, Fehrle I, Hartmann J, Niehl A, Kopka J and Fisahn J** (2010) Metabolic profiling of *Arabidopsis thaliana* epidermal cells. *J Ex Bot* **61**: 1321-35
- Filisetti-Cozzi TM, Carpita NC** (1991) Measurement of uronic acids without interference from neutral sugars. *Anal Biochem* **197**: 157-162
- Meyer K, Leube MP, Grill E** (1994) A protein phosphatase 2C involved in ABA signal transduction in *Arabidopsis thaliana*. *Science* **264**: 1452-1455
- Neumetzler L** (2010) Identification and characterization of *Arabidopsis* mutants associated with xyloglucan metabolism. Rhombos-Verlag, Berlin; ISBN 978-3-941216-39-6
- Neff MM, Turk E, Kalishman M** (2002) Web-based primer design for single nucleotide polymorphism analysis. *Trends Genet* **18**: 613-615
- Reiter WD, Chapple CC, Somerville CR** (1993) Altered growth and cell walls in a fucose-deficient mutant of *Arabidopsis*. *Science* **261**: 1032-1035
- Scott, TA, Melvin EH** (1953) Determination of dextran with anthrone. *Anal Chemistry* **25**: 1656-1661
- Zhang X, Oppenheimer DG** (2004) A simple and efficient method for isolating trichomes for downstream analyses. *Plant Cell Physiol* **45**: 221-224
